# Supplementary material
Source: PubMed Central journal article supplement (PMC484162)
Supplement: nar_32_12_3546__8.pdf [file nar_32_12_3546__8.pdf]

Supplemental Table: Chromosomal Deletion Lines Used for Physical Mapping

| Groups <sup>a</sup> |               |               |               |               |               |               |
|---------------------|---------------|---------------|---------------|---------------|---------------|---------------|
| 1                   | 2             | 3             | 4             | 5             | 6             | 7             |
| 1AS-1 (0.47)        | 2AS-2 (0.34)  | 3AS-2 (0.23)  | 4AS-1 (0.20)  | 5AS-1 (0.40)  | 6AS-1 (0.35)  | 7AS-1 (0.89)  |
| 1AS-2 (0.45)        | 2AS-3 (0.00)  | 3AS-3 (0.71)  | 4AS-2 (0.71)  | 5AS-2 (1.00)  | 6AS-2 (0.00)  | 7AS-2 (0.73)  |
| 1AS-3 (0.86)        | 2AS-4 (0.44)  | 3AS-4 (0.45)  | 4AS-3 (0.76)  | 5AS-3 (0.75)  | 6AS-4 (0.67)  | 7AS-3 (0.29)  |
| 1AS-5 (0.20)        | 2AS-5 (0.78)  | 3AL-1 (0.26)  | 4AS-4 (0.63)  | 5AS-6 (0.97)  | 6AS-5 (0.65)  | 7AS-4 (0.26)  |
| 1AL-1 (0.17)        | 2AS-6 (0.51)  | 3AL-2 (0.21)  | 4AL-1 (0.85)  | 5AS-7 (0.98)  | 6AL-1 (0.69)  | 7AS-5 (0.59)  |
| 1AL-2 (0.38)        | 2AS-8 (0.59)  | 3AL-3 (0.42)  | 4AL-2 (0.75)  | 5AS-9 (0.98)  | 6AL-2 (0.89)  | 7AS-6 (0.21)  |
| 1AL-3 (0.61)        | 2AL-1 (0.85)  | 3AL-4 (0.61)  | 4AL-5 (0.66)  | 5AS-10 (1.00) | 6AL-4 (0.55)  | 7AS-7 (0.87)  |
| 1AL-4 (0.47)        | 2AL-3 (0.77)  | 3AL-5 (0.78)  | 4AL-6 (0.84)  | 5AL-1 (0.11)  | 6AL-5 (0.83)  | 7AS-8 (0.45)  |
| 1AL-5 (0.46)        | 2BS-1 (0.53)  | 3AL-6 (0.21)  | 4AL-7 (0.66)  | 5AL-3 (0.56)  | 6AL-6 (0.57)  | 7AS-9 (0.89)  |
| 1BS-1 (0.35)        | 2BS-2 (0.15)  | 3AL-8 (0.85)  | 4AL-8 (0.37)  | 5AL-5 (0.46)  | 6AL-8 (0.90)  | 7AS-10 (0.45) |
| 1BS-2 (1.06)        | 2BS-3 (0.84)  | 3BS-1 (0.33)  | 4AL-11 (0.66) | 5AL-6 (0.68)  | 6BS-1 (0.25)  | 7AS-11 (0.33) |
| 1BS-3 (0.72)        | 2BS-5 (0.79)  | 3BS-2 (0.56)  | 4AL-12 (0.43) | 5AL-7 (0.87)  | 6BS-2 (1.05)  | 7AS-12 (0.83) |
| 1BS-4 (0.52)        | 2BS-6 (0.56)  | 3BS-3 (0.87)  | 4AL-14 (0.79) | 5AL-8 (0.67)  | 6BS-3 (1.05)  | 7AL-1 (0.39)  |
| 1BS-6 (1.04)        | 2BS-7 (0.89)  | 3BS-4 (0.55)  | 4BS-1 (0.81)  | 5AL-9 (0.43)  | 6BS-5 (0.76)  | 7AL-2 (0.87)  |
| 1BS-7 (0.80)        | 2BS-8 (0.57)  | 3BS-5 (0.20)  | 4BS-2 (0.75)  | 5AL-10 (0.57) | 6BS-8 (0.83)  | 7AL-3 (0.29)  |
| 1BS-8 (1.02)        | 2BS-9 (0.40)  | 3BS-6 (0.57)  | 4BS-3 (0.81)  | 5AL-11 (0.16) | 6BS-6 *       | 7AL-4 (0.18)  |
| 1BS-9 (0.84)        | 2BS-10 (0.16) | 3BS-7 (0.75)  | 4BS-4 (0.37)  | 5AL-15 (0.67) | 6BL-1 (0.70)  | 7AL-5 (0.63)  |
| 1BS-10 (0.50)       | 2BS-11 (0.27) | 3BS-8 (0.78)  | 4BS-6 (0.73)  | 5AL-16 (0.43) | 6BL-3 (0.36)  | 7AL-6 (0.80)  |
| 1BS-13 (1.04)       | 2BS-12 (0.81) | 3BS-9 (0.57)  | 4BS-7 (0.73)  | 5AL-17 (0.78) | 6BL-4 (0.44)  | 7AL-7 (0.33)  |
| 1BS-15 (0.50)       | 2BS-14 (0.83) | 3BL-2 (0.22)  | 4BS-8 (0.57)  | 5AL-20 (0.82) | 6BL-5 (0.40)  | 7AL-8 (0.83)  |
| 1BS-16 (0.99)       | 2BS-15 (0.73) | 3BL-3 (0.41)  | 4BL-1 (0.71)  | 5AL-23 (0.87) | 6BL-6 (0.79)  | 7AL-9 (0.94)  |
| 1BS-18 (0.50)       | 2BL-1 (0.69)  | 3BL-4 (0.07)  | 4BL-2 (0.47)  | 5BS-2 (0.42)  | 6BL-8 (0.66)  | 7AL-10 (0.49) |
| 1BS-19 (0.31)       | 2BL-2 (0.36)  | 3BL-5 (0.22)  | 4BL-3 (0.68)  | 5BS-3 (0.41)  | 6BL-9 (0.64)  | 7AL-11 (0.40) |
| 1BS-20 (0.54)       | 2BL-3 (0.35)  | 3BL-6 (0.54)  | 4BL-4 (0.55)  | 5BS-4 (0.43)  | 6BL-10 (0.26) | 7AL-13 (0.83) |
| 1BS-21 (0.49)       | 2BL-5 (0.59)  | 3BL-7 (0.63)  | 4BL-5 (0.86)  | 5BS-5 (0.71)  | 6BL-11 (0.36) | 7AL-14 (0.31) |
| 1BS-22 (0.24)       | 2BL-6 (0.89)  | 3BL-8 (0.28)  | 4BL-6 (0.10)  | 5BS-6 (0.81)  | 6BL-12 (0.05) | 7AL-15 (0.99) |
| 1BL-1 (0.47)        | 2BL-9 (0.16)  | 3BL-9 (0.38)  | 4BL-7 (0.70)  | 5BS-8 (0.56)  | 6BL-13 (0.13) | 7AL-16 (0.86) |
| 1BL-2 (0.69)        | 2DS-1 (0.33)  | 3BL-10 (0.50) | 4BL-8 (0.78)  | 5BS-9 (0.43)  | 6BL-14 (0.65) | 7AL-17 (0.71) |
| 1BL-3 (0.85)        | 2DS-2 (0.36)  | 3BL-11 (0.81) | 4BL-10 (0.95) | 5BL-1 (0.55)  | 6DS-2 (0.45)  | 7AL-20 (0.89) |
| 1BL-4 (0.89)        | 2DS-3 (0.36)  | 3DS-1 (0.39)  | 4BL-11 (0.58) | 5BL-2 (0.26)  | 6DS-3 (0.00)  | 7AL-21 (0.74) |
| 1BL-5 (0.84)        | 2DS-4 (0.41)  | 3DS-2 (0.25)  | 4BL-12 (0.41) | 5BL-3 (0.53)  | 6DS-4 (0.79)  | 7BS-1 (0.27)  |
| 1BL-6 (0.32)        | 2DS-5 (0.47)  | 3DS-3 (0.24)  | 4BL-13 (0.62) | 5BL-5 (0.54)  | 6DS-5 (0.38)  | 7BS-2 (0.27)  |
| 1BL-7 (0.47)        | 2DS-6 (0.00)  | 3DS-4 (0.59)  | 4DS-1 (0.53)  | 5BL-6 (0.29)  | 6DS-6 (0.99)  | 7BS-3 (0.16)  |
| 1BL-8 (0.74)        | 2DL-2 (0.09)  | 3DS-5 (0.49)  | 4DS-2 (0.82)  | 5BL-7 (0.43)  | 6DL-1 (0.47)  | 7BL-1 (0.40)  |
| 1BL-9 (0.73)        | 2DL-3 (0.49)  | 3DS-6 (0.55)  | 4DS-3 (0.67)  | 5BL-8 (0.52)  | 6DL-2 (0.08)  | 7BL-2 (0.33)  |
| 1BL-10 (0.89)       | 2DL-4 (0.26)  | 3DS-7 (0.30)  | 4DS-4 (0.77)  | 5BL-9 (0.76)  | 6DL-3 (0.21)  | 7BL-3 (0.86)  |
| 1BL-11 (0.23)       | 2DL-6 (0.94)  | 3DS-8 (0.44)  | 4DS-5 (0.63)  | 5BL-11 (0.59) | 6DL-5 (0.07)  | 7BL-4 (0.56)  |
| 1BL-12 (0.84)       | 2DL-7 (0.12)  | 3DL-1 (0.23)  | 4DL-1 (0.46)  | 5BL-14 (0.75) | 6DL-6 (0.29)  | 7BL-5 (0.69)  |
| 1BL-13 (0.89)       | 2DL-8 (0.58)  | 3DL-2 (0.27)  | 4DL-2 (0.7)   | 5BL-15 (0.37) | 6DL-7 (0.66)  | 7BL-6 (0.84)  |
| 1BL-14 (0.61)       | 2DL-9 (0.76)  | 3DL-3 (0.81)  | 4DL-3 (0.51)  | 5BL-16 (0.79) | 6DL-12 (0.68) | 7BL-7 (0.63)  |

|               |               |               |               |               |               |
|---------------|---------------|---------------|---------------|---------------|---------------|
| 1BL-15 (0.82) | 2DL-10 (0.47) | 4DL-5 (0.09)  | 5DS-1 (0.63)  | 6DL-13 (0.76) | 7BL-8 (0.21)  |
| 1BL-16 (0.47) | 2DL-11 (0.66) | 4DL-6 (0.38)  | 5DS-2 (0.78)  |               | 7BL-9 (0.45)  |
| 1BL-19 (0.61) |               | 4DL-7 (0.41)  | 5DS-5 (0.67)  |               | 7BL-10 (0.78) |
| 1DS-1 (0.59)  |               | 4DL-8 (0.53)  | 5DL-1 (0.60)  |               | 7BL-11 (0.86) |
| 1DS-2 (0.57)  |               | 4DL-9 (0.31)  | 5DL-2 (0.69)  |               | 7BL-12 (0.25) |
| 1DS-3 (0.48)  |               | 4DL-10 (0.35) | 5DL-3 (0.39)  |               | 7BL-13 (0.79) |
| 1DS-4 (0.66)  |               | 4DL-12 (0.71) | 5DL-5 (0.76)  |               | 7BL-14 (0.14) |
| 1DS-5 (0.70)  |               | 4DL-13 (0.56) | 5DL-7 (0.29)  |               | 7DS-1 (0.37)  |
| 1DL-1 (0.23)  |               | 4DL-14 (0.86) | 5DL-8 (0.72)  |               | 7DS-3 (0.15)  |
| 1DL-2 (0.41)  |               |               | 5DL-9 (0.74)  |               | 7DS-4 (0.61)  |
| 1DL-3 (0.25)  |               |               | 5DL-10 (0.35) |               | 7DS-5 (0.36)  |
| 1DL-4 (0.18)  |               |               | 5DL-12 (0.48) |               | 7DL-1 (0.14)  |
|               |               |               |               |               | 7DL-2 (0.61)  |
|               |               |               |               |               | 7DL-3 (0.82)  |
|               |               |               |               |               | 7DL-4 (0.76)  |
|               |               |               |               |               | 7DL-5 (0.30)  |
|               |               |               |               |               | 7DL-6 (0.10)  |
|               |               |               |               |               | 7DL-7 (0.84)  |

\* Fraction length value was not determined.

<sup>a</sup> ‘A’, ‘B’ and ‘D’ letters stands for the wheat genomes. ‘S’ and ‘L’ stands for short and long arm of a chromosome. The number within the parenthesis shows the fraction length of the corresponding deletion arm. For instance, 1AS-1 (0.47) denotes a deletion line of short arm of chromosome *1* of A genome that has 47% of the short arm present.
