# Supplementary material
Source: PubMed Central journal article supplement (PMC484162)

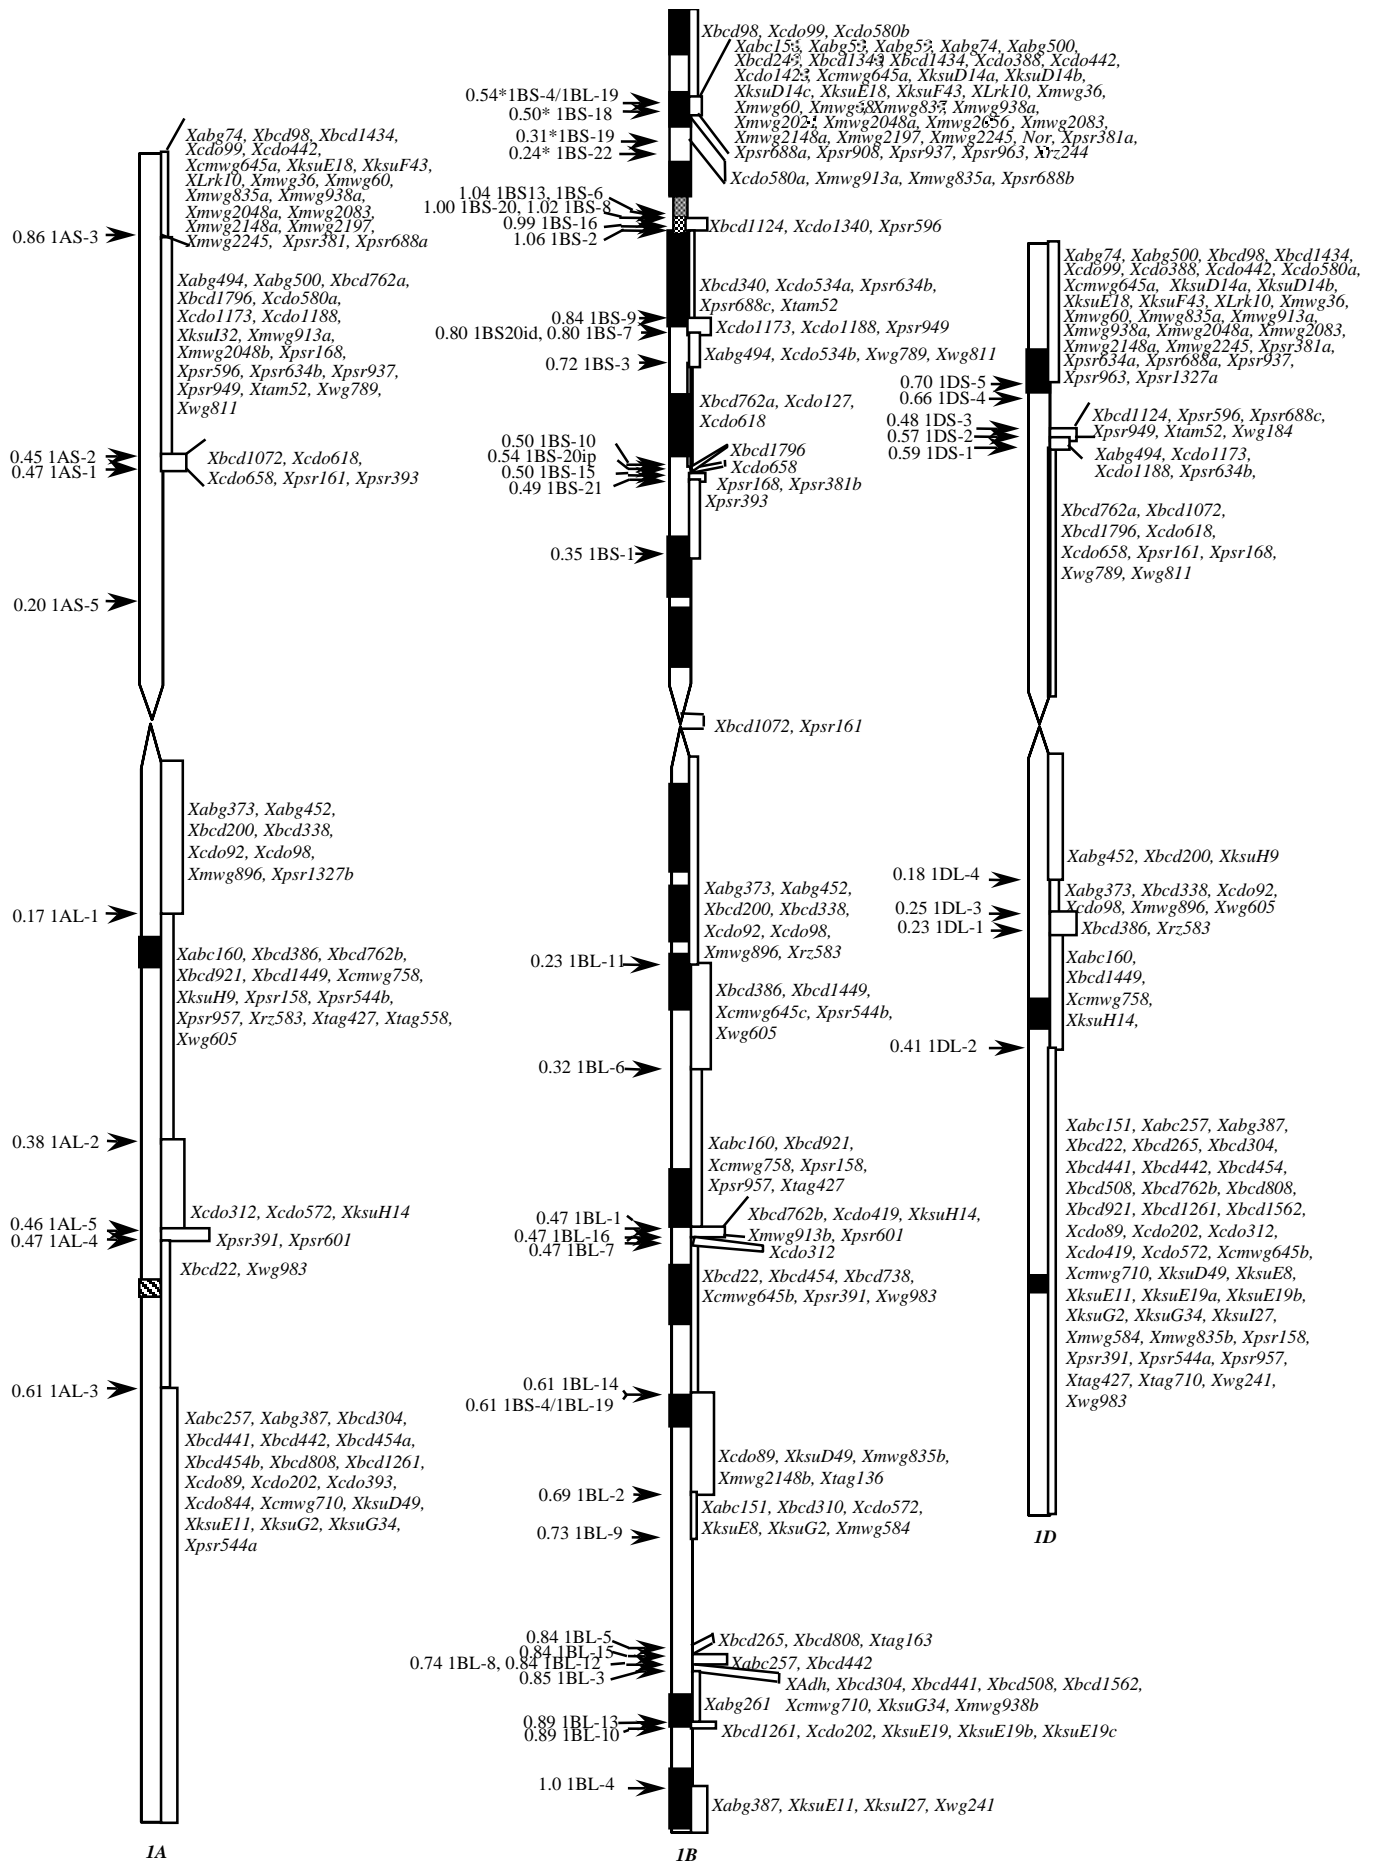

Supplement: nar_32_12_3546__1.pdf [file nar_32_12_3546__1.pdf]

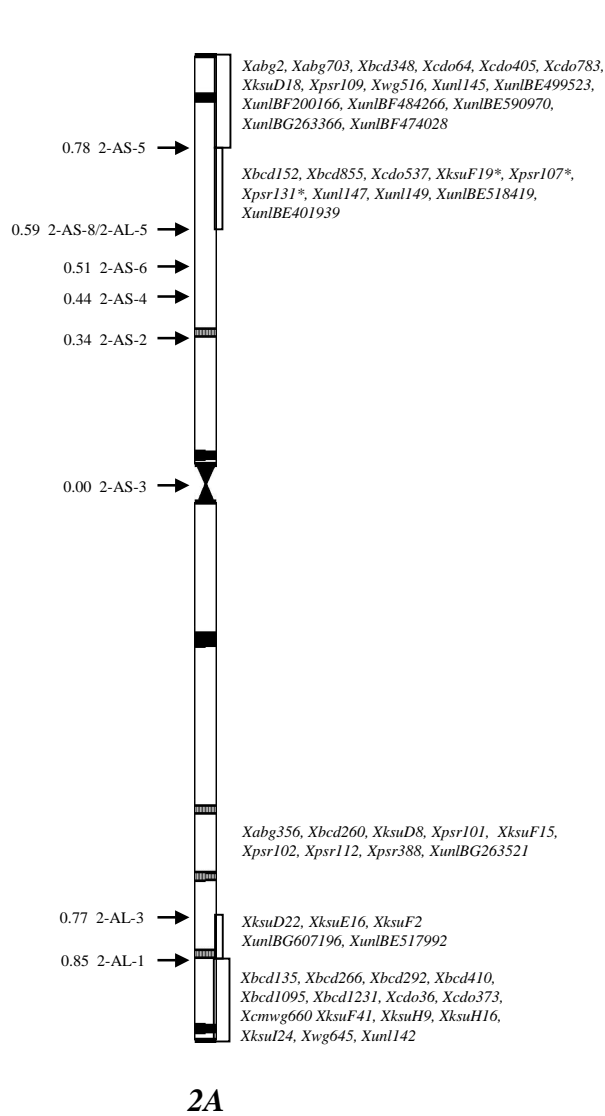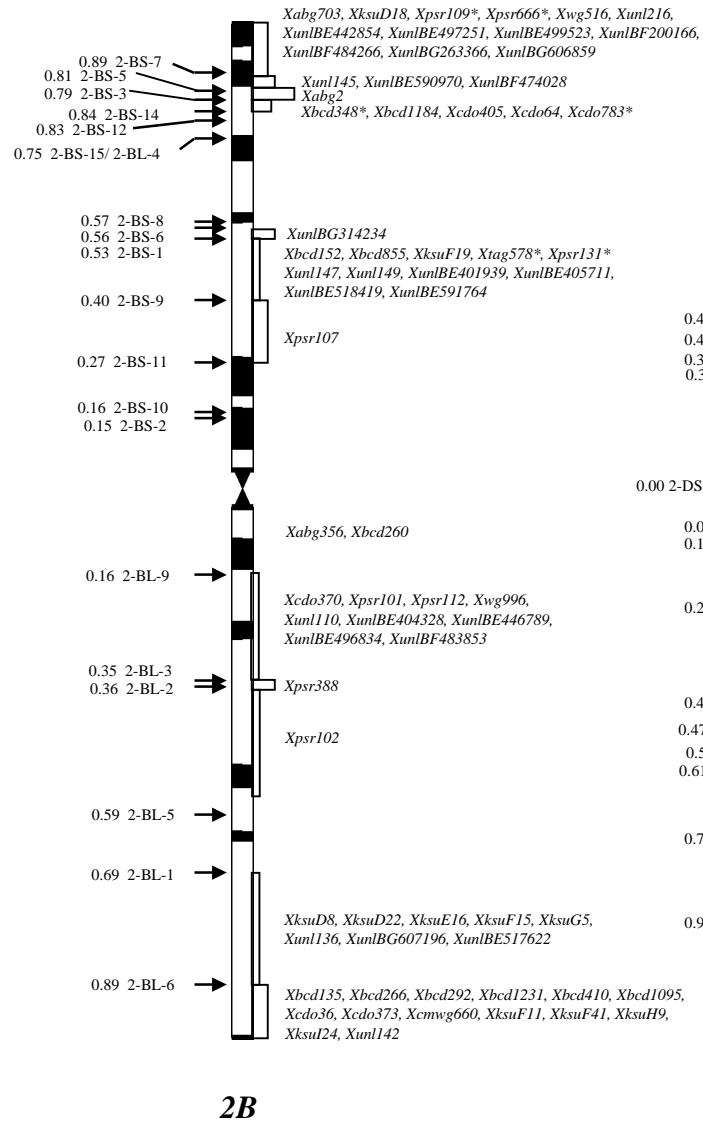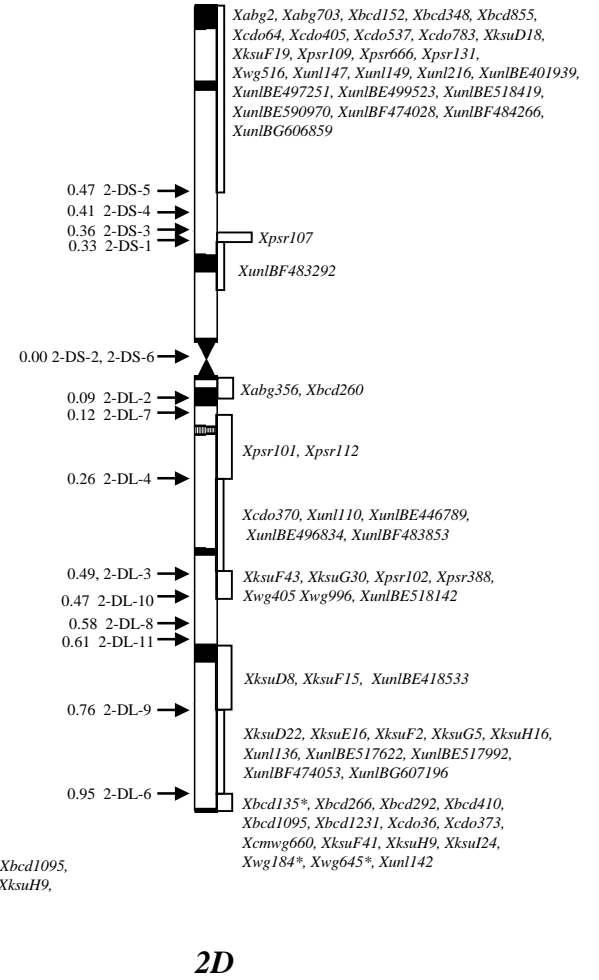

Supplement: nar_32_12_3546__2.pdf [file nar_32_12_3546__2.pdf]

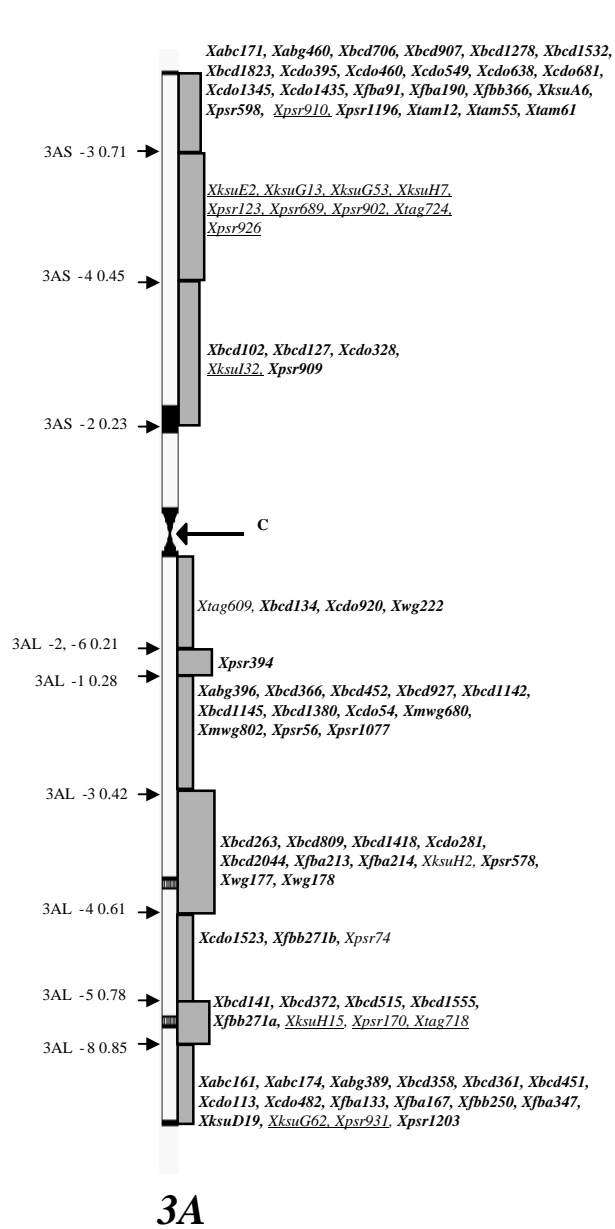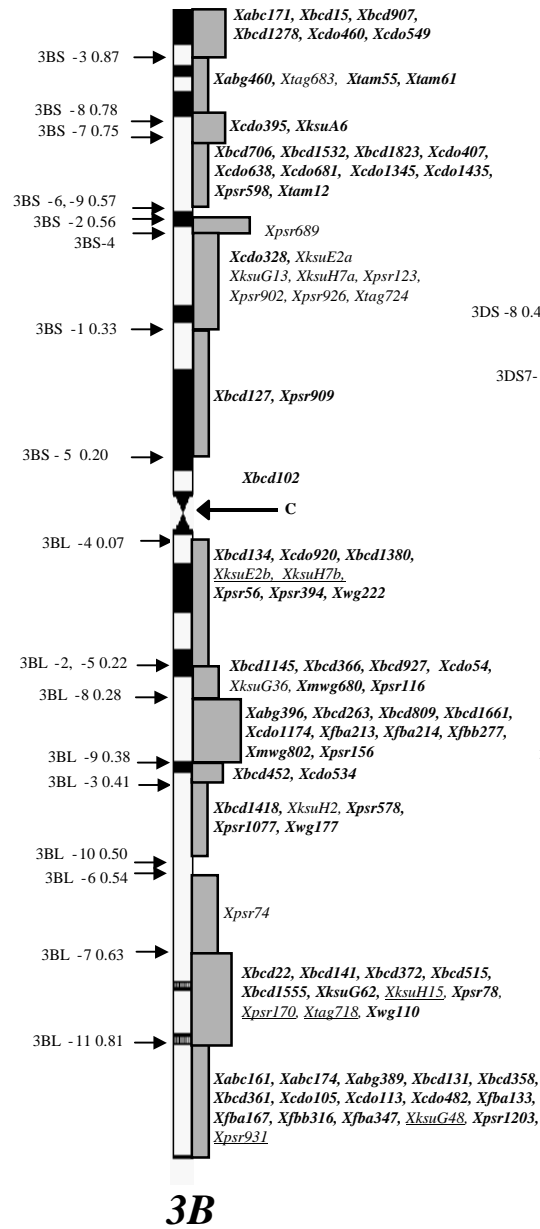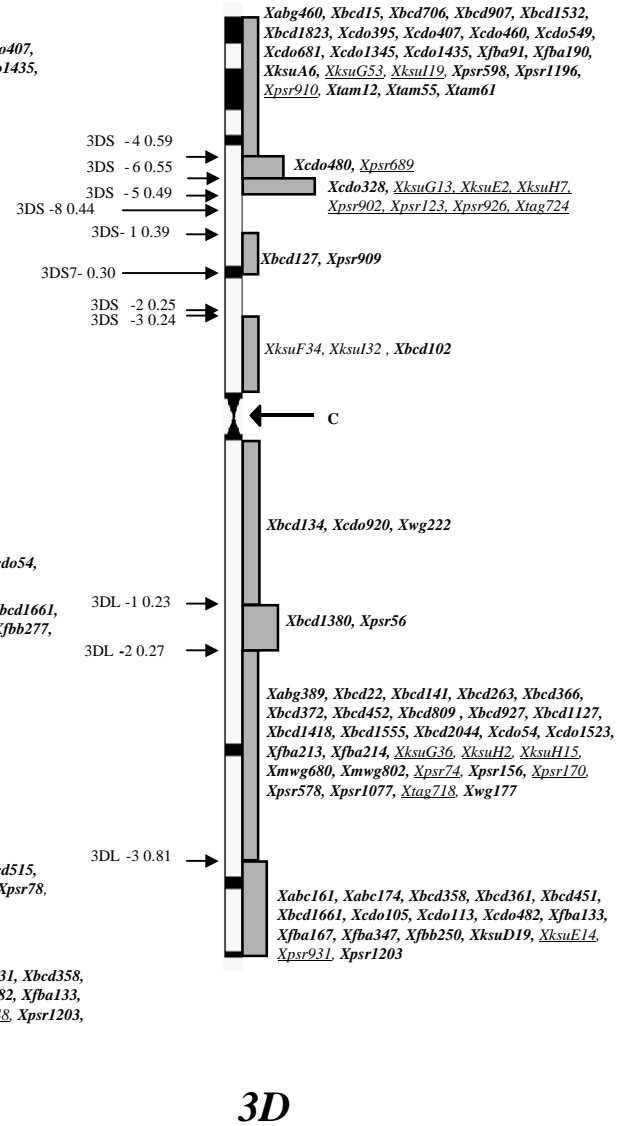

Supplement: nar_32_12_3546__3.pdf [file nar_32_12_3546__3.pdf]

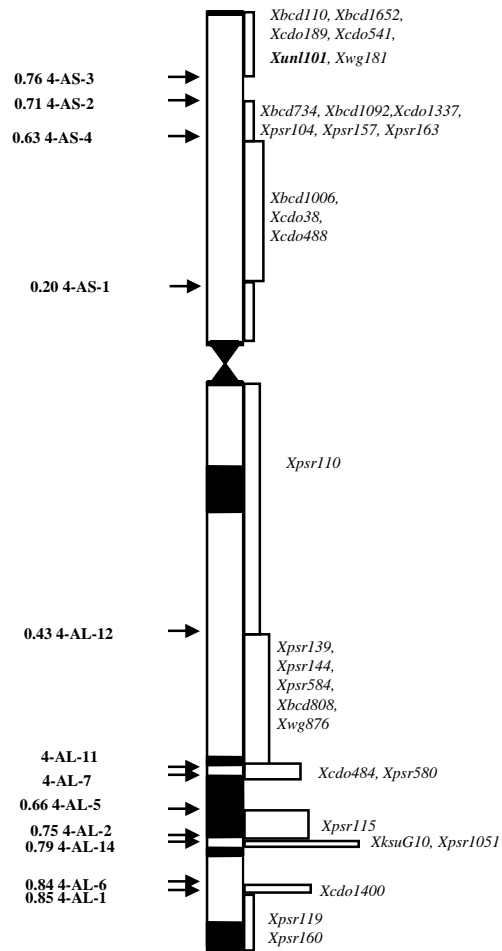

4A

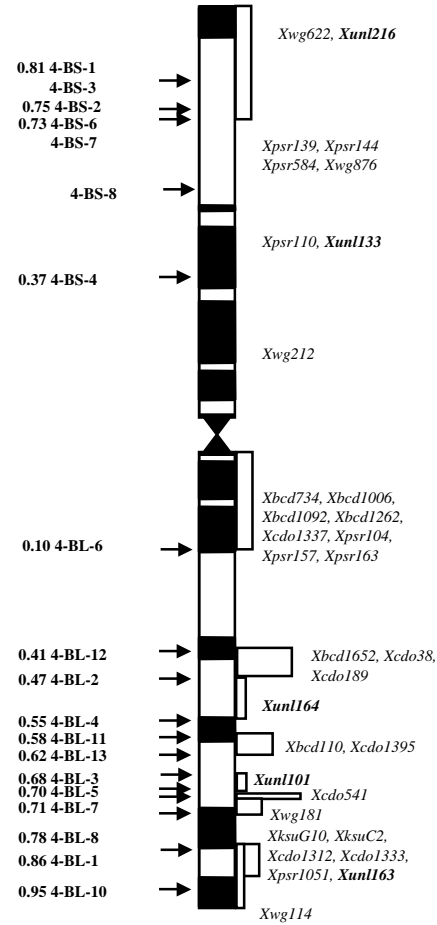

4B

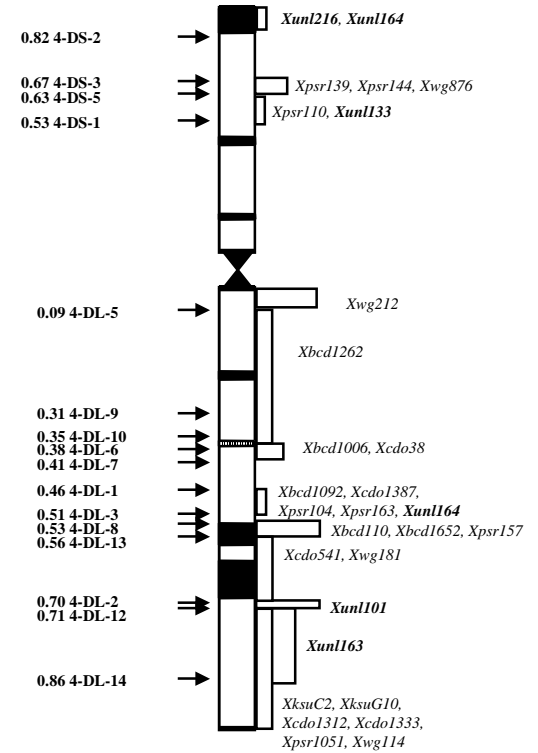

4D

Supplement: nar_32_12_3546__4.pdf [file nar_32_12_3546__4.pdf]

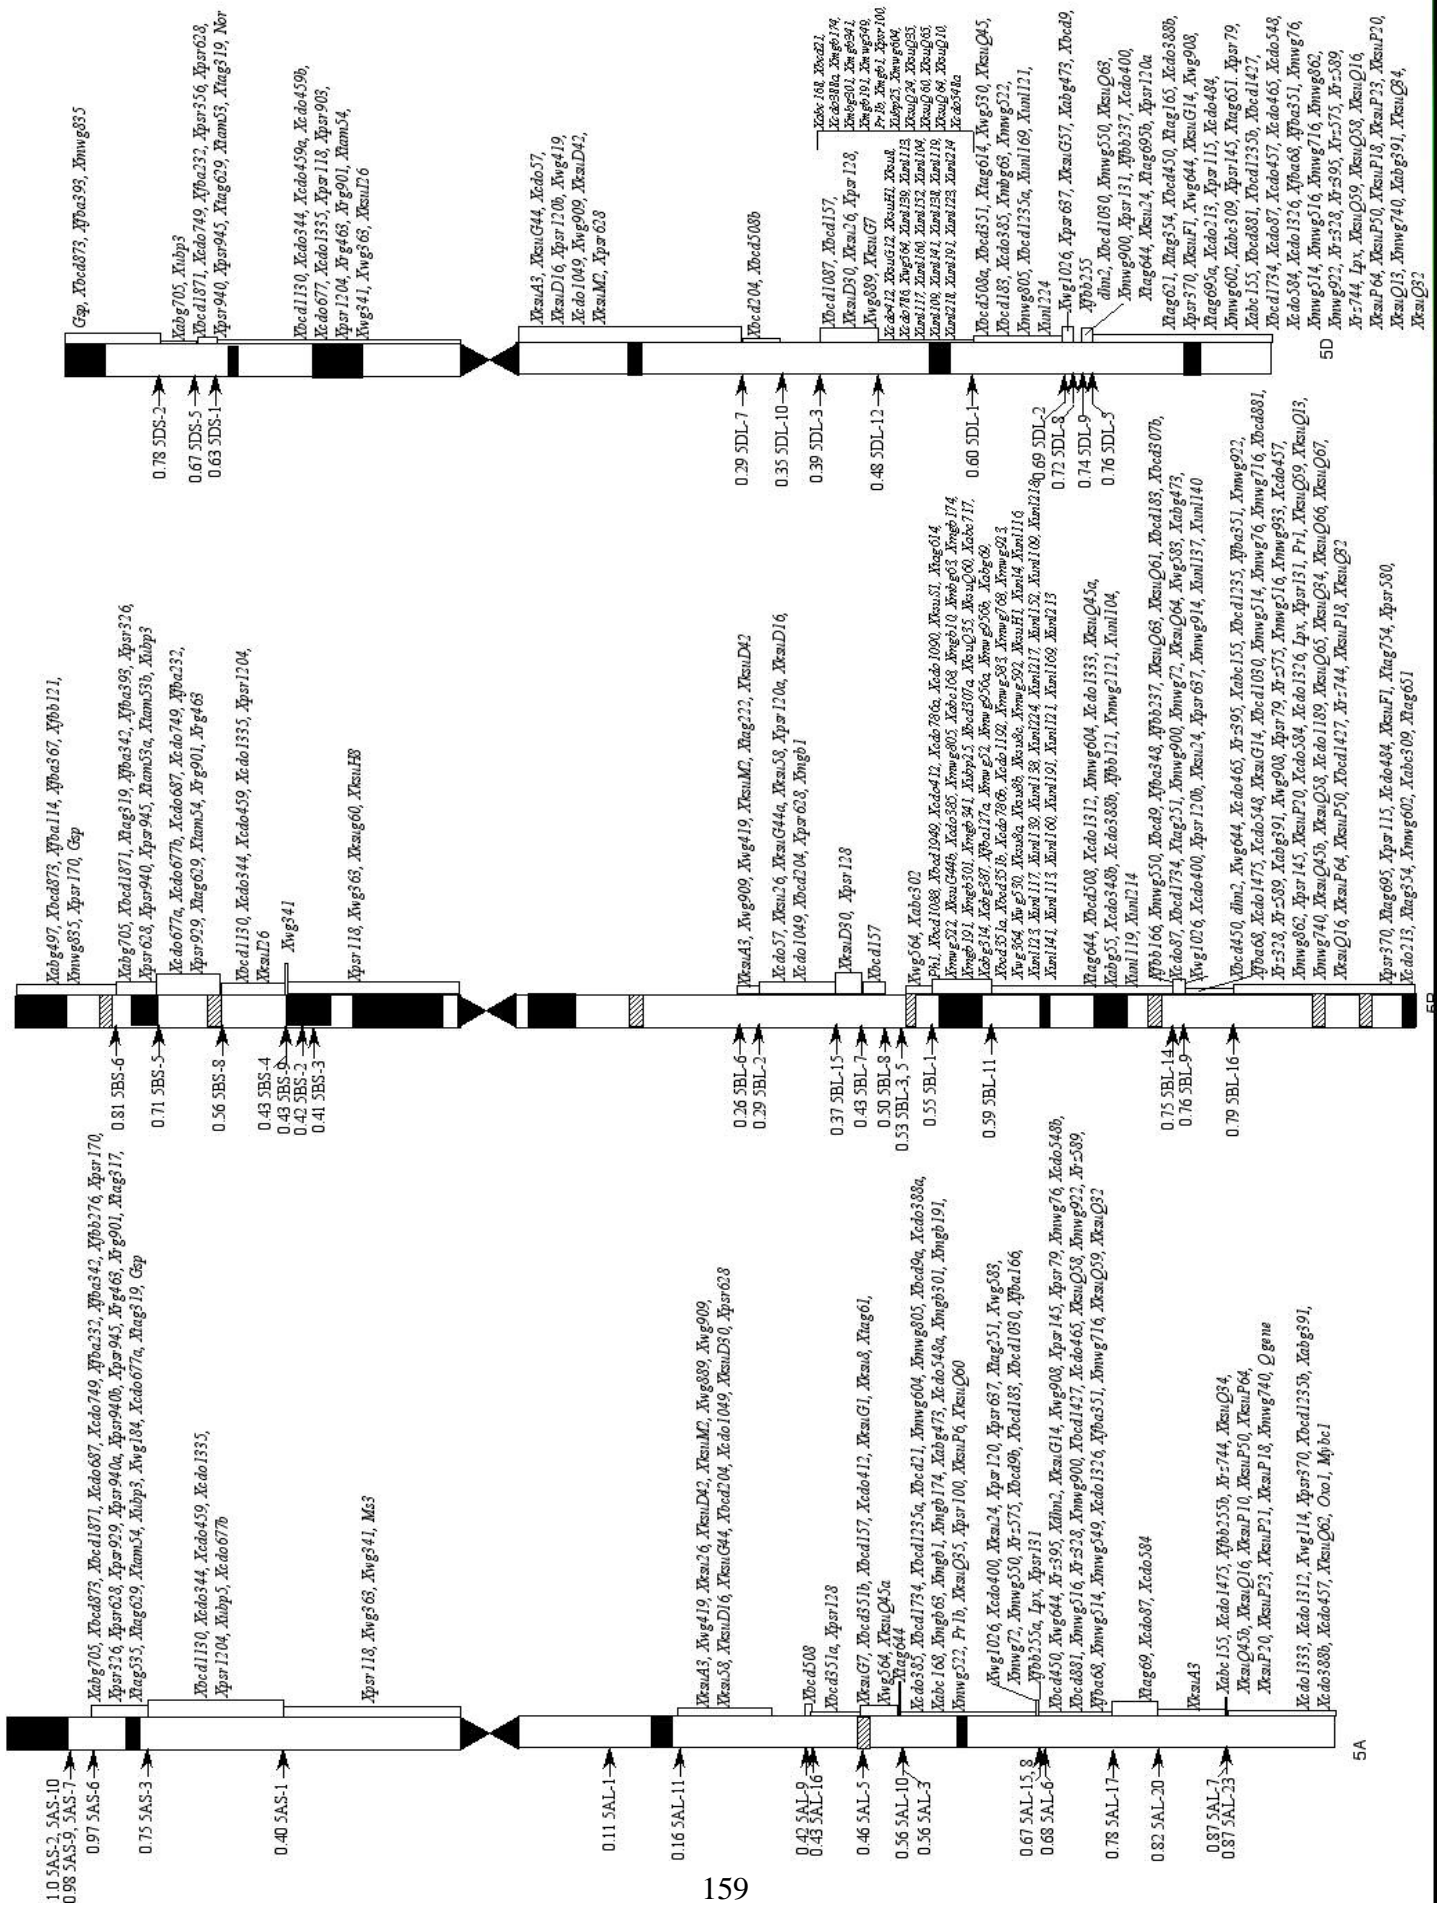

Supplement: nar_32_12_3546__5.pdf [file nar_32_12_3546__5.pdf]

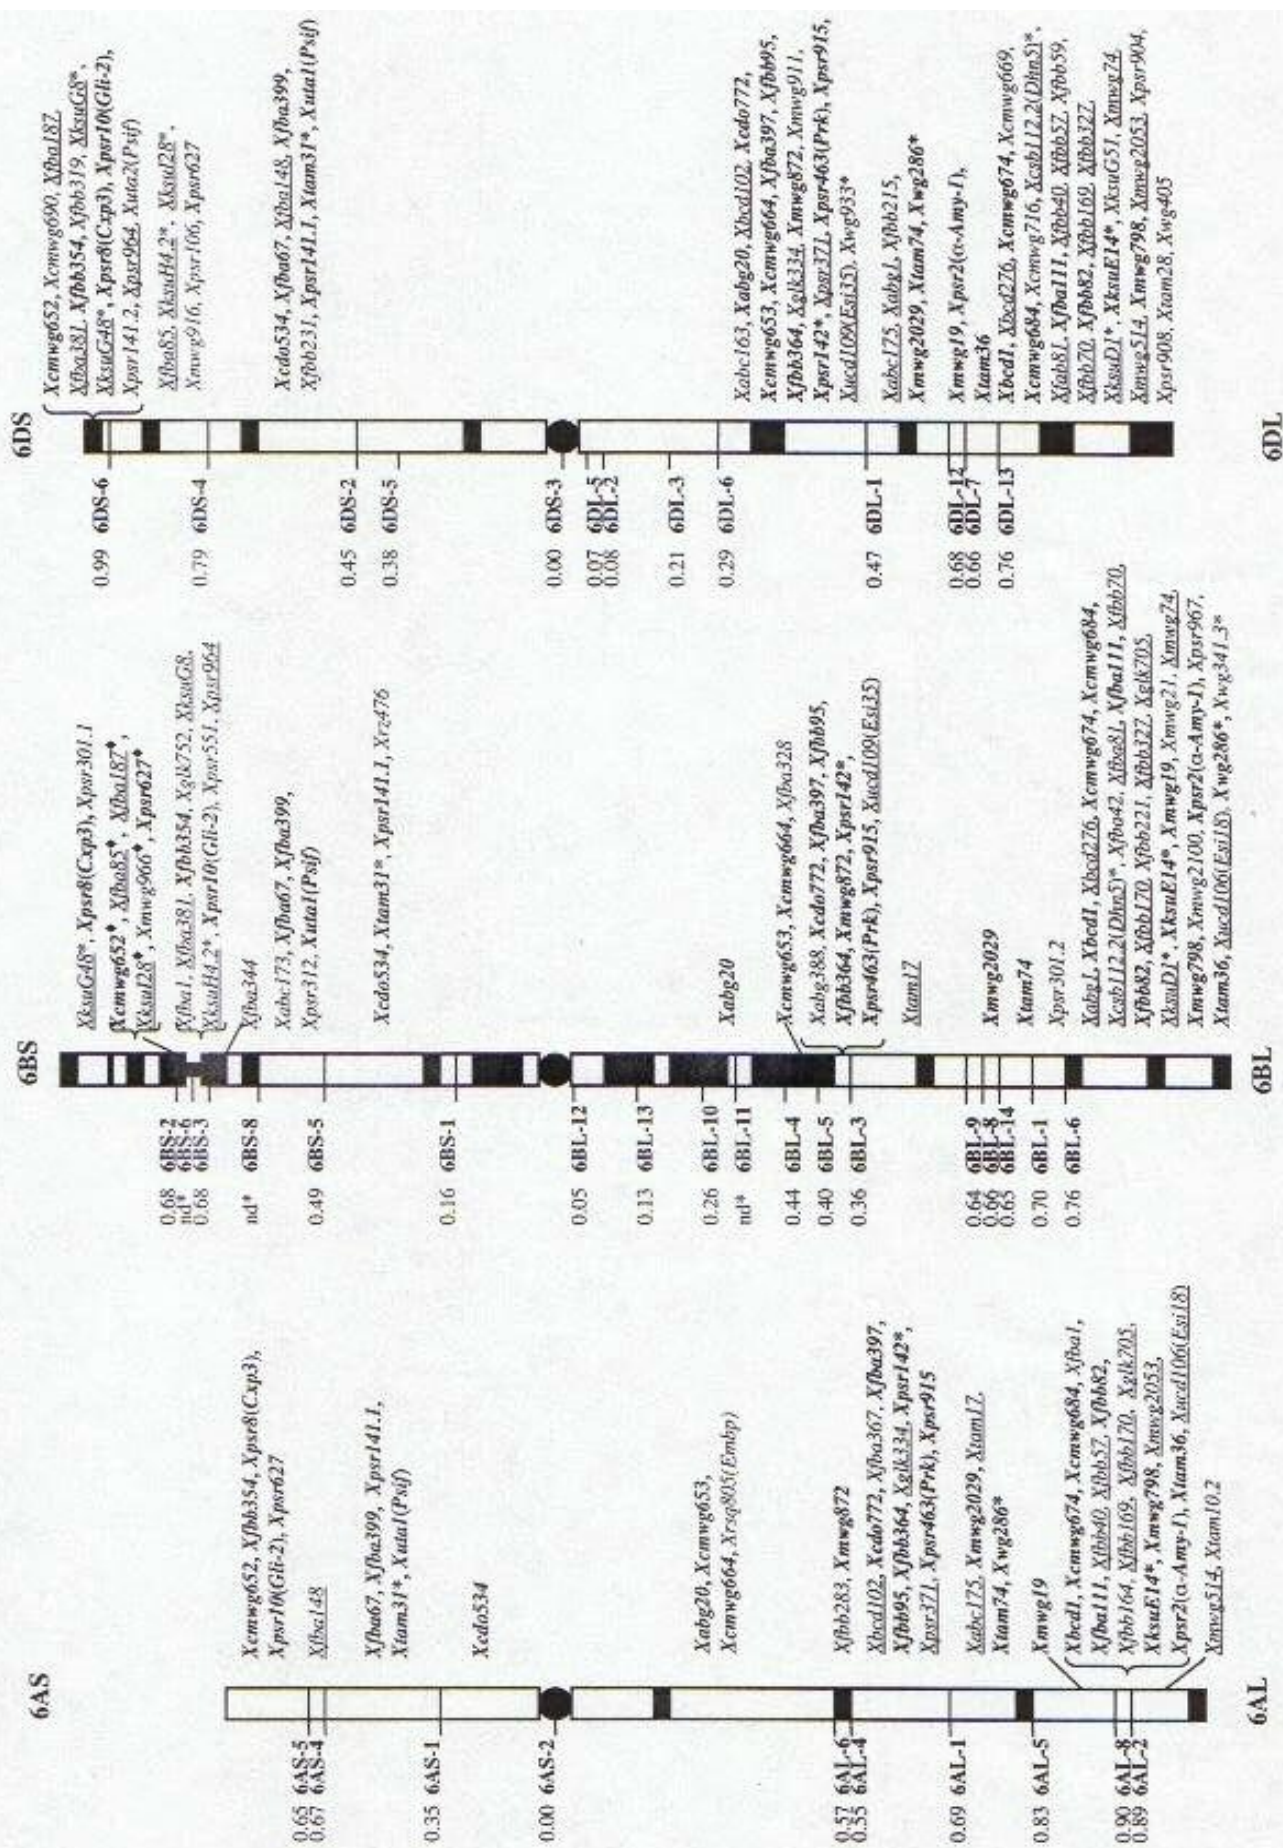

Supplement: nar_32_12_3546__6.pdf [file nar_32_12_3546__6.pdf]

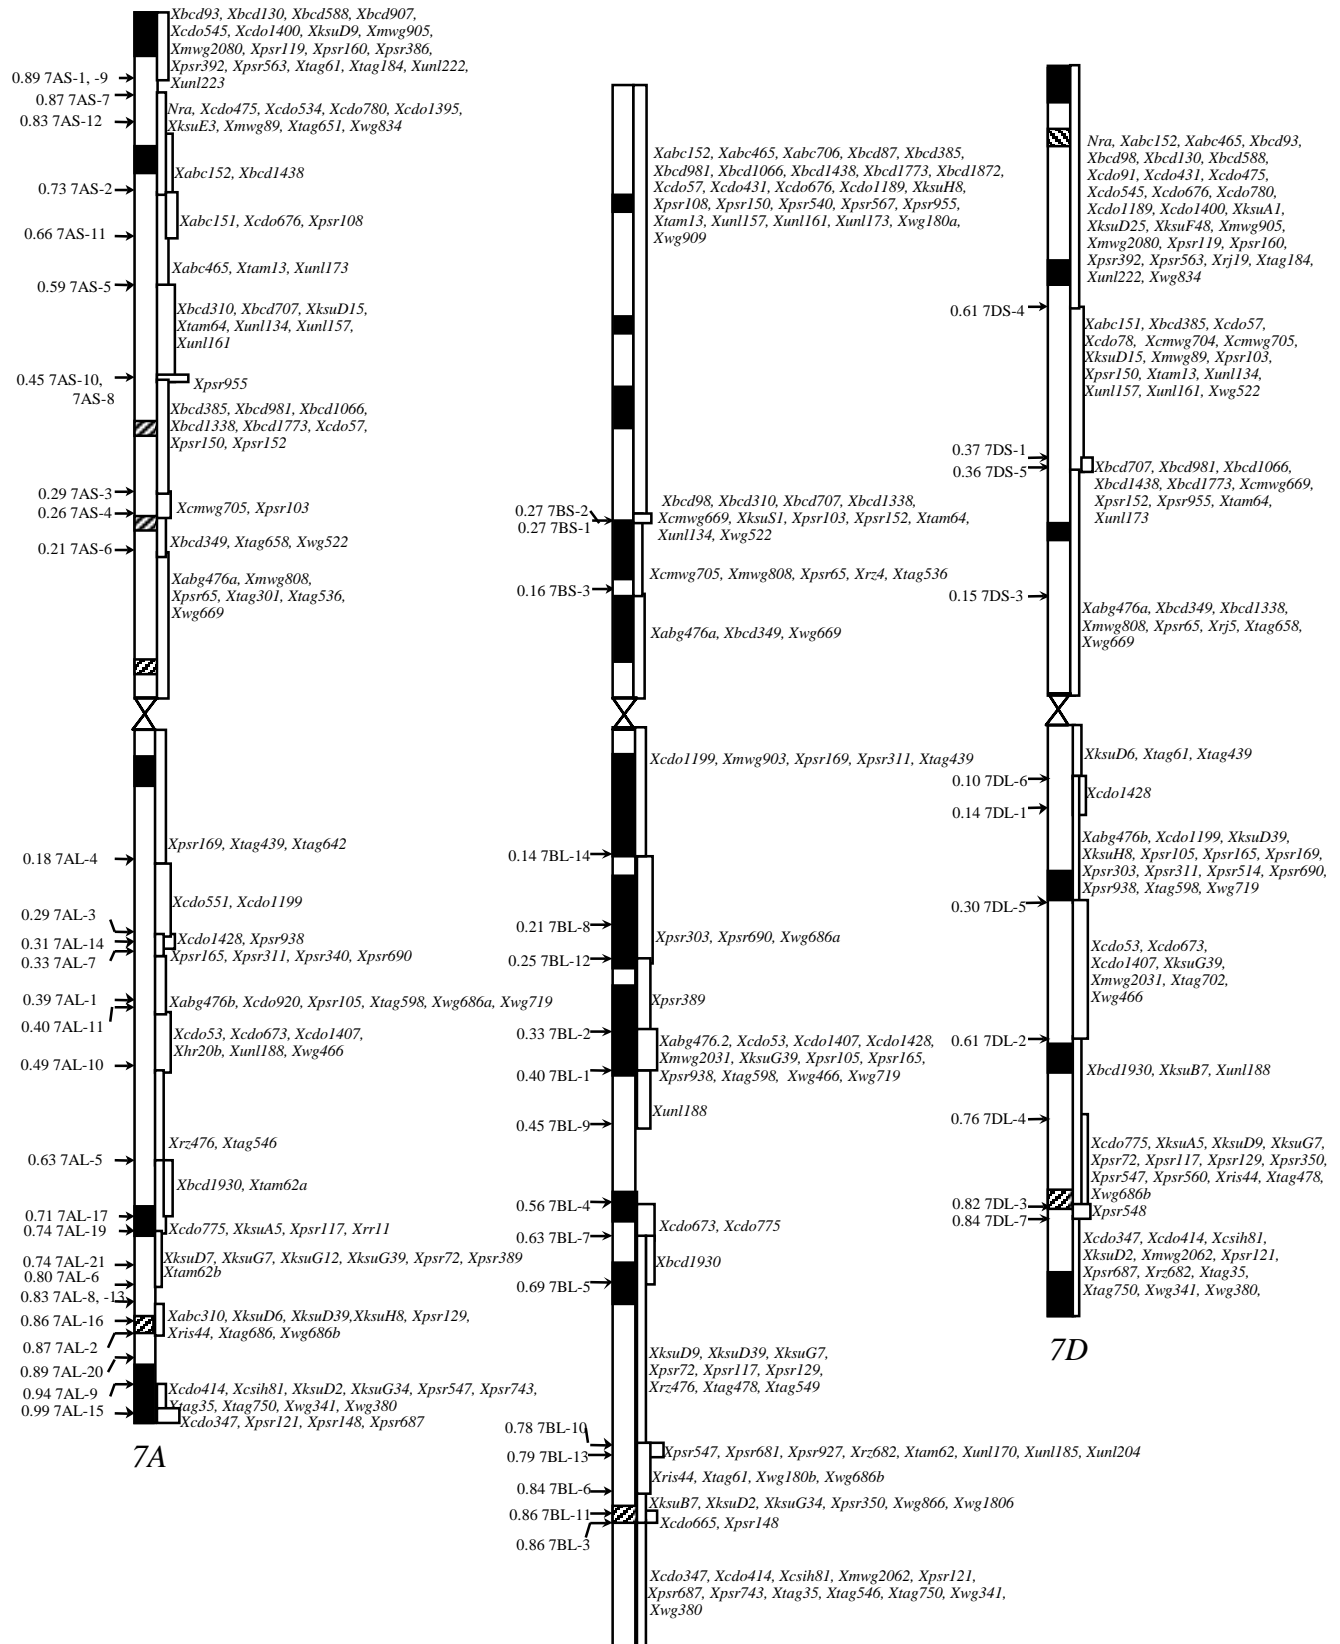

Supplement: nar_32_12_3546__7.pdf [file nar_32_12_3546__7.pdf]
